# Supplementary material for: A Novel Mouse Model for Stable Engraftment of a Human Immune System and Human Hepatocytes
Source: PubMed Central journal article supplement (PMC4364106; doi:10.1371/journal.pone.0119820), 2015-03-17
Supplement: pone.0119820.s001.pdf [file pone.0119820.s001.pdf]

**Table S1.**

Antibodies used for flow cytometry analysis.

| <b>Antigen</b> | <b>Reactivity</b> | <b>Clone</b> | <b>Supplier</b> |
|----------------|-------------------|--------------|-----------------|
| CD45.2         | Mouse             | 104          | Biolegend       |
| CD45           | Human             | 5B1          | Miltenyi        |
| CD4            | Human             | VIT4         | Miltenyi        |
| CD8            | Human             | RPA-T8       | BD Biosciences  |
| CD3            | Human             | UCHT1        | BD Biosciences  |
| CD45RO         | Human             | UCHL1        | Miltenyi        |
| CD45RA         | Human             | T6D11        | Miltenyi        |
| HLA-DR         | Human             | L243         | Ebioscience     |
| CD19           | Human             | LT19         | Miltenyi        |
| CD20           | Human             | 2H7          | Biolegend       |
| IgM            | Human             | G20-127      | BD Biosciences  |
| IgD            | Human             | IA6-2        | BD Biosciences  |
| CD14           | Human             | TUK4         | Miltenyi        |
| CD123          | Human             | 6H6          | Ebioscience     |
| CD11c          | Human             | 3.9          | Ebioscience     |
| NKp46          | Human             | 9E2/NKp46    | BD Biosciences  |
| IFN $\gamma$   | Human             | 45-15        | Miltenyi        |
| TNF $\alpha$   | Human             | cA2          | Miltenyi        |
